# Supplementary material
Source: PubMed Central journal article supplement (PMC6867232)
Supplement: ehp-127-107012-s001.pdf [file ehp-127-107012-s001.pdf]

**Note to readers with disabilities:** *EHP* strives to ensure that all journal content is accessible to all readers. However, some figures and Supplemental Material published in *EHP* articles may not conform to [508 standards](#) due to the complexity of the information being presented. If you need assistance accessing journal content, please contact [ehp508@niehs.nih.gov](mailto:ehp508@niehs.nih.gov). Our staff will work with you to assess and meet your accessibility needs within 3 working days.

### **Supplemental Material**

#### **Long-Term Exposure to Particulate Air Pollution, Black Carbon, and Their Source Components in Relation to Ischemic Heart Disease and Stroke**

Petter L. S. Ljungman, Niklas Andersson, Leo Stockfelt, Eva M. Andersson, Johan Nilsson Sommar, Kristina Eneroth, Lars Gidhagen, Christer Johansson, Anton Lager, Karin Leander, Peter Molnar, Nancy L. Pedersen, Debora Rizzuto, Annika Rosengren, David Segersson, Patrik Wennberg, Lars Barregard, Bertil Forsberg, Gerd Sallsten, Tom Bellander, and Göran Pershagen

#### **Table of Contents**

**Table S1.** Descriptive data for four sub-cohorts included in Stockholm CEANS.

**Table S2.** Pearson correlation coefficients between pollutants.

**Table S3.** Associations between long-term air pollution and incident ischemic heart disease (IHD) per interquartile range increase (IQR): Comparing estimates between main models and sensitivity analyses adjusted for BMI and BMI<sup>2</sup>.

**Table S4.** Associations between long-term air pollution and incident stroke per interquartile range increase (IQR): Comparing estimates between main models and sensitivity analyses adjusted for BMI and BMI<sup>2</sup>.

**Table S5.** Associations between long-term air pollution and incident ischemic heart disease (IHD) per interquartile range increase (IQR): Comparing estimates between main models and sensitivity analyses excluding the PPS cohort.

**Table S6.** Associations between long-term air pollution and incident stroke per interquartile range increase (IQR): Comparing estimates between main models and sensitivity analyses excluding the PPS cohort.

**Table S7.** Associations between same year exposure to BC and incident stroke by level of potential effect modifiers.

**Figure S1.** Local source contributions to residential PM<sub>10</sub> levels by study.

**Figure S2.** Local source contributions to residential BC levels by study.

**Figure S3.** City-specific and overall meta-analyses estimates for associations between same year, 1-5 year, and 6-10 year average of total PM<sub>10</sub> exposure and incident ischemic heart disease. Hazard ratios and 95% confidence intervals per 3.28 µg/m<sup>3</sup> PM<sub>10</sub>. Fixed effects meta-analyses used inverse variance weighted estimates. Random effects meta-analyses used a DerSimonian and Laird methodology. I-squared statistics and p-value for the chi-squared test of significance of the hazard ratio for the fixed effect models for each time-window were as follows: <sup>a</sup>0.0%, p=0.606, <sup>b</sup>0.0%, p=0.458, <sup>c</sup>6.6%, p=0.360. I-squared statistic is the percentage of variation attributable to heterogeneity.

**Figure S4.** City-specific and overall meta-analyses estimates for associations between same year, 1-5 year, and 6-10 year average of total PM<sub>2.5</sub> exposure and incident ischemic heart disease. Hazard ratios and 95% confidence intervals per 1.94 µg/m<sup>3</sup> PM<sub>2.5</sub>. Fixed effects meta-analyses used inverse variance weighted estimates. Random effects meta-analyses used a DerSimonian and Laird methodology. I-squared statistics and p-value for the chi-squared test of significance of the hazard ratio for the fixed effect models for each time-window were as follows: <sup>a</sup>27.4%, p=0.247, <sup>b</sup>11.5%, p=0.335, <sup>c</sup>45.1%, p=0.141. I-squared statistic is the percentage of variation attributable to heterogeneity.

**Figure S5.** City-specific and overall meta-analyses estimates for associations between same year, 1-5 year, and 6-10 year average of total BC exposure and incident ischemic heart disease. Hazard ratios and 95% confidence intervals per 0.31 µg/m<sup>3</sup> BC. Fixed effects meta-analyses used inverse variance weighted estimates. Random effects meta-analyses used a DerSimonian and Laird methodology. I-squared statistics and p-value for the chi-squared test of significance of the hazard ratio for the fixed effect models for each time-window were as follows: <sup>a</sup>0.0%, p=0.530, <sup>b</sup>0.0%, p=0.866, <sup>c</sup>0.0%, p=0.722. I-squared statistic is the percentage of variation attributable to heterogeneity.

**Figure S6.** City-specific and overall meta-analyses estimates for associations between same year average PM<sub>2.5</sub> levels from residential heating sources and incident ischemic heart disease. Hazard ratios and 95% confidence intervals per 0.52 µg/m<sup>3</sup> PM<sub>2.5</sub> from residential heating sources. I-V, inverse variance weighted fixed-effects meta-analyses. I-squared statistic is the percentage of variation attributable to heterogeneity. P-value for the chi-squared test of significance of hazard ratio of fixed-effect model. D+L, DerSimonian and Laird random-effects estimates.

**Figure S7.** City-specific and overall meta-analyses estimates for associations between same year, 1-5 year, and 6-10 year average of total PM<sub>10</sub> exposure and incident stroke. Hazard ratios and 95% confidence intervals per 3.28 µg/m<sup>3</sup> PM<sub>10</sub>. Fixed effects meta-analyses used inverse variance weighted estimates. Random effects meta-analyses used a DerSimonian and Laird methodology. I-squared statistics and p-value for the chi-squared test of significance of the hazard ratio for the fixed effect models for each time-window were as follows: <sup>a</sup>21.5%, p=0.281, <sup>b</sup>0.0%, p=0.540, <sup>c</sup>0.0%, p=0.533. I-squared statistic is the percentage of variation attributable to heterogeneity.

**Figure S8.** City-specific and overall meta-analyses estimates for associations between same year, 1-5 year, and 6-10 year average of total PM<sub>2.5</sub> exposure and incident stroke. Hazard ratios and 95% confidence intervals per 1.94 µg/m<sup>3</sup> PM<sub>2.5</sub>. Fixed effects meta-analyses used inverse variance weighted estimates. Random effects meta-analyses used a DerSimonian and Laird methodology. I-squared statistics and p-value for the chi-squared test of significance of the hazard ratio for the fixed effect models for each time-window were as follows: <sup>a</sup>28.5%, p=0.241, <sup>b</sup>0.0%, p=0.518, <sup>c</sup>0.0%, p=0.476. I-squared statistic is the percentage of variation attributable to heterogeneity.

**Figure S9.** City-specific and overall meta-analyses estimates for associations between same year, 1-5 year, and 6-10 year average of total BC exposure and incident stroke. Hazard ratios and 95% confidence intervals per 0.31 µg/m<sup>3</sup> BC. Fixed effects meta-analyses used inverse variance weighted estimates. Random effects meta-analyses used a DerSimonian and Laird methodology. I-squared statistics and p-value for the chi-squared test of significance of the hazard ratio for the fixed effect models for each time-window were as follows: <sup>a</sup>0.0%, p=0.663, <sup>b</sup>0.0%, p=0.847, <sup>c</sup>0.0%, p=0.716. I-squared statistic is the percentage of variation attributable to heterogeneity.

**Figure S10.** City-specific and overall meta-analyses estimates for associations between same year average BC levels from traffic sources and incident stroke. Hazard ratios and 95% confidence intervals per 0.26 µg/m<sup>3</sup> BC from traffic sources. I-V, inverse variance weighted fixed-effects meta-analyses. I-squared statistic is the percentage of variation attributable to heterogeneity. P-value for the chi-squared test of significance of hazard ratio of fixed-effect model. D+L, DerSimonian and Laird random-effects estimates.

**Table S1. Descriptive data for four sub-cohorts included in Stockholm CEANS**

|                                                                                       | SDPP       | SALT              | 60YO       | SNAC-K          | All four   |
|---------------------------------------------------------------------------------------|------------|-------------------|------------|-----------------|------------|
| N                                                                                     | 7949       | 6884              | 4224       | 3257            | 22314      |
| Years of enrollment                                                                   | 1992-1998  | 1998-2003         | 1997-1999  | 2001-2004       | 1992-2004  |
| Age in 1990, years, median (range)                                                    | 43 (29-52) | 46 (31-92)        | 52 (51-63) | 61 (46-91)      | 48 (29-92) |
| Female (%)                                                                            | 61         | 56                | 52         | 65              | 58         |
| Married/living with partner (%)                                                       | 83.1       | 65.6              | 71.6       | 43.1            | 69.7       |
| Missing data                                                                          | 0.4        | 1.6               | 3.3        | 0.2             | 1.3        |
| Smoking status (%)                                                                    |            |                   |            |                 |            |
| Current smoker                                                                        | 26.5       | 19.9              | 20.6       | 14.0            | 21.5       |
| Former smoker                                                                         | 36.4       | 34.9              | 37.4       | 37.1            | 36.2       |
| Never smoker                                                                          | 37.1       | 42.6              | 39.0       | 46.2            | 40.5       |
| Missing data                                                                          | 0.1        | 2.6               | 3.0        | 2.7             | 1.8        |
| Physical activity (%)                                                                 |            |                   |            |                 |            |
| Once a month or less / <1h/week                                                       | 65.8       | 53.4              | 66.4       | 61.1            | 61.4       |
| About once a week / ~1h/week                                                          | 26.4       | 34.7              | 22.2       | 14.7            | 26.5       |
| 3 times a week or more / >2h/week                                                     | 7.7        | 8.8               | 7.1        | 5.4             | 7.6        |
| Missing data                                                                          | 0.1        | 3.1               | 4.3        | 18.9            | 4.6        |
| Alcohol consumption (%)                                                               |            |                   |            |                 |            |
| Daily                                                                                 | 4          | 8 <sup>β</sup>    | 5          | 11 <sup>v</sup> | 6          |
| Weekly                                                                                | 65         | 62 <sup>β</sup>   | 38         | 43              | 57         |
| Seldom                                                                                | 27         | 25                | 44         | 35              | 30         |
| Never                                                                                 | 3          | 3                 | 10         | 9               | 5          |
| Missing                                                                               | 0.5        | 1.6               | 2.8        | 1.5             | 1.3        |
| Occupation status (%)                                                                 |            |                   |            |                 |            |
| Gainfully employed                                                                    | 90.6       | 60.5              | 64.7       | 20.8            | 66.2       |
| Unemployed / Not gainfully employed                                                   | 6.5        | 2.2               | 14.0       | 0.8             | 5.8        |
| Retired                                                                               | 2.6        | 36.8 <sup>δ</sup> | 17.6       | 76.2            | 26.7       |
| Missing data                                                                          | 0.4        | 0.5               | 3.8        | 2.3             | 1.3        |
| Socio-economic index (%)                                                              |            |                   |            |                 |            |
| Blue collar worker                                                                    | 28.1       | 26.6              | 28.8       | 19.9            | 26.5       |
| Low and intermediate level white collar worker and self-employed                      | 52.9       | 49.4              | 50.0       | 50.0            | 50.7       |
| High-level white-collar worker (and self-employed professionals with academic degree) | 16.3       | 17.6              | 17.6       | 26.2            | 18.3       |
| Missing data                                                                          | 2.7        | 6.3               | 5.0        | 3.7             | 4.4        |
| Education (%)                                                                         |            |                   |            |                 |            |
| Primary school or less                                                                | 30.8       | 26.5              | 38.6       | 27.7            | 30.5       |
| Up to secondary school or equivalent                                                  | 37.3       | 35.1              | 31.1       | 39.2            | 35.7       |
| University degree and more                                                            | 29.2       | 35.2              | 26.6       | 32.4            | 31.1       |
| Missing data                                                                          | 2.7        | 3.2               | 3.7        | 0.7             | 2.8        |
| Body mass index kg/m <sup>2</sup> , mean (SD)                                         | 25.7 (4.0) | 24.5 (3.5)        | 26.8 (4.2) | 25.6 (4.3)      | 25.5 (4.0) |

<sup>α</sup> Based on answers in categories

<sup>β</sup> Daily is ≥14 glasses/week and Weekly is 1-14 glasses/week

- <sup>y</sup> Based on two sources, a food frequency questionnaire, used as the primary source, and a separate alcohol question where “Daily” is  $\geq 4$  times/week, the highest category of the alcohol question, for individuals lacking responses in the food frequency questionnaire (25% of participants).
- <sup>6</sup> Everyone over 64 years is considered to be retired

**Table S2 Pearson correlation coefficients between pollutants**

| <b>Gothenburg PPS</b>                |                        |                         |          |                        |                         |          |                       |                          |                                      |                           |                           |                    |                        |
|--------------------------------------|------------------------|-------------------------|----------|------------------------|-------------------------|----------|-----------------------|--------------------------|--------------------------------------|---------------------------|---------------------------|--------------------|------------------------|
|                                      | Total PM <sub>10</sub> | Total PM <sub>2.5</sub> | Total BC | Local PM <sub>10</sub> | Local PM <sub>2.5</sub> | Local BC | PM <sub>10</sub> wear | PM <sub>10</sub> exhaust | PM <sub>10</sub> residential heating | PM <sub>10</sub> shipping | PM <sub>10</sub> industry | BC traffic exhaust | BC residential heating |
| Total PM <sub>10</sub>               | 1.00                   |                         |          |                        |                         |          |                       |                          |                                      |                           |                           |                    |                        |
| Total PM <sub>2.5</sub>              | 0.73                   | 1.00                    |          |                        |                         |          |                       |                          |                                      |                           |                           |                    |                        |
| Total BC                             | 0.56                   | 0.55                    | 1.00     |                        |                         |          |                       |                          |                                      |                           |                           |                    |                        |
| Local PM <sub>10</sub>               | 0.61                   | 0.56                    | 0.98     | 1.00                   |                         |          |                       |                          |                                      |                           |                           |                    |                        |
| Local PM <sub>2.5</sub>              | 0.47                   | 0.63                    | 0.87     | 0.92                   | 1.00                    |          |                       |                          |                                      |                           |                           |                    |                        |
| Local BC                             | 0.56                   | 0.55                    | 1.00     | 0.98                   | 0.87                    | 1.00     |                       |                          |                                      |                           |                           |                    |                        |
| PM <sub>10</sub> wear                | 0.64                   | 0.42                    | 0.94     | 0.93                   | 0.72                    | 0.94     | 1.00                  |                          |                                      |                           |                           |                    |                        |
| PM <sub>10</sub> traffic exhaust     | 0.57                   | 0.49                    | 0.98     | 0.95                   | 0.78                    | 0.98     | 0.97                  | 1.00                     |                                      |                           |                           |                    |                        |
| PM <sub>10</sub> residential heating | 0.12                   | 0.38                    | 0.27     | 0.36                   | 0.62                    | 0.27     | 0.07                  | 0.13                     | 1.00                                 |                           |                           |                    |                        |
| PM <sub>10</sub> shipping            | 0.31                   | 0.29                    | 0.49     | 0.50                   | 0.48                    | 0.49     | 0.44                  | 0.44                     | 0.07                                 | 1.00                      |                           |                    |                        |
| PM <sub>10</sub> industry            | 0.03                   | 0.39                    | 0.23     | 0.30                   | 0.54                    | 0.23     | 0.04                  | 0.13                     | 0.26                                 | 0.29                      | 1.00                      |                    |                        |
| BC traffic exhaust                   | 0.56                   | 0.47                    | 0.98     | 0.93                   | 0.75                    | 0.98     | 0.97                  | 0.99                     | 0.09                                 | 0.44                      | 0.10                      | 1.00               |                        |
| BC residential heating               | 0.13                   | 0.35                    | 0.25     | 0.34                   | 0.60                    | 0.25     | 0.07                  | 0.12                     | 0.99                                 | 0.05                      | 0.23                      | 0.07               | 1.00                   |

**Göteborg MONICA**

|                                      | Total<br>PM <sub>10</sub> | Total<br>PM <sub>2.5</sub> | Total<br>BC | Local<br>PM <sub>10</sub> | Local<br>PM <sub>2.5</sub> | Local<br>BC | PM <sub>10</sub><br>wear | PM <sub>10</sub><br>exhaust | PM <sub>10</sub><br>residential<br>heating | PM <sub>10</sub><br>shipping | PM <sub>10</sub><br>industry | BC<br>traffic |
|--------------------------------------|---------------------------|----------------------------|-------------|---------------------------|----------------------------|-------------|--------------------------|-----------------------------|--------------------------------------------|------------------------------|------------------------------|---------------|
| Total PM <sub>10</sub>               | 1.00                      |                            |             |                           |                            |             |                          |                             |                                            |                              |                              |               |
| Total PM <sub>2.5</sub>              | 0.70                      | 1.00                       |             |                           |                            |             |                          |                             |                                            |                              |                              |               |
| Total BC                             | 0.54                      | 0.56                       | 1.00        |                           |                            |             |                          |                             |                                            |                              |                              |               |
| Local PM <sub>10</sub>               | 0.60                      | 0.52                       | 0.97        | 1.00                      |                            |             |                          |                             |                                            |                              |                              |               |
| Local PM <sub>2.5</sub>              | 0.48                      | 0.57                       | 0.89        | 0.93                      | 1.00                       |             |                          |                             |                                            |                              |                              |               |
| Local BC                             | 0.54                      | 0.56                       | 1.00        | 0.97                      | 0.89                       | 1.00        |                          |                             |                                            |                              |                              |               |
| PM <sub>10</sub> wear                | 0.63                      | 0.42                       | 0.93        | 0.94                      | 0.76                       | 0.93        | 1.00                     |                             |                                            |                              |                              |               |
| PM <sub>10</sub> traffic exhaust     | 0.55                      | 0.51                       | 0.98        | 0.94                      | 0.80                       | 0.98        | 0.96                     | 1.00                        |                                            |                              |                              |               |
| PM <sub>10</sub> residential heating | 0.17                      | 0.32                       | 0.29        | 0.39                      | 0.66                       | 0.29        | 0.12                     | 0.14                        | 1.00                                       |                              |                              |               |
| PM <sub>10</sub> shipping            | 0.32                      | 0.27                       | 0.50        | 0.51                      | 0.47                       | 0.50        | 0.48                     | 0.47                        | 0.06                                       | 1.00                         |                              |               |
| PM <sub>10</sub> industry            | -0.01                     | 0.33                       | 0.31        | 0.33                      | 0.51                       | 0.31        | 0.14                     | 0.24                        | 0.25                                       | 0.30                         | 1.00                         |               |
| BC traffic exhaust                   | 0.53                      | 0.51                       | 0.98        | 0.92                      | 0.77                       | 0.98        | 0.94                     | 1.00                        | 0.11                                       | 0.47                         | 0.21                         | 1.00          |
| BC residential heating               | 0.17                      | 0.28                       | 0.26        | 0.37                      | 0.62                       | 0.26        | 0.10                     | 0.11                        | 0.99                                       | 0.04                         | 0.21                         | 0.08          |

**Stockholm CEANS**

|                                      | Total<br>PM <sub>10</sub> | Total<br>PM <sub>2.5</sub> | Total<br>BC | Local<br>PM <sub>10</sub> | Local<br>PM <sub>2.5</sub> | Local<br>BC | PM <sub>10</sub><br>wear | PM <sub>10</sub><br>exhaust | PM <sub>10</sub><br>residential<br>heating | PM <sub>10</sub><br>shipping | PM <sub>10</sub><br>industry | BC<br>traffic |
|--------------------------------------|---------------------------|----------------------------|-------------|---------------------------|----------------------------|-------------|--------------------------|-----------------------------|--------------------------------------------|------------------------------|------------------------------|---------------|
| Total PM <sub>10</sub>               | 1.00                      |                            |             |                           |                            |             |                          |                             |                                            |                              |                              |               |
| Total PM <sub>2.5</sub>              | 0.83                      | 1.00                       |             |                           |                            |             |                          |                             |                                            |                              |                              |               |
| Total BC                             | 0.91                      | 0.69                       | 1.00        |                           |                            |             |                          |                             |                                            |                              |                              |               |
| Local PM <sub>10</sub>               | 0.93                      | 0.69                       | 0.97        | 1.00                      |                            |             |                          |                             |                                            |                              |                              |               |
| Local PM <sub>2.5</sub>              | 0.89                      | 0.71                       | 0.91        | 0.96                      | 1.00                       |             |                          |                             |                                            |                              |                              |               |
| Local BC                             | 0.91                      | 0.69                       | 1.00        | 0.97                      | 0.91                       | 1.00        |                          |                             |                                            |                              |                              |               |
| PM <sub>10</sub> wear                | 0.92                      | 0.65                       | 0.96        | 0.99                      | 0.90                       | 0.96        | 1.00                     |                             |                                            |                              |                              |               |
| PM <sub>10</sub> traffic exhaust     | 0.88                      | 0.67                       | 0.99        | 0.94                      | 0.86                       | 0.99        | 0.95                     | 1.00                        |                                            |                              |                              |               |
| PM <sub>10</sub> residential heating | 0.04                      | 0.15                       | -0.04       | 0.07                      | 0.33                       | -0.04       | -0.09                    | -0.13                       | 1.00                                       |                              |                              |               |
| PM <sub>10</sub> shipping            | 0.43                      | 0.30                       | 0.50        | 0.47                      | 0.46                       | 0.50        | 0.46                     | 0.48                        | -0.06                                      | 1.00                         |                              |               |
| PM <sub>10</sub> industry            | 0.44                      | 0.51                       | 0.41        | 0.42                      | 0.49                       | 0.41        | 0.36                     | 0.36                        | 0.23                                       | 0.34                         | 1.00                         |               |
| BC traffic exhaust                   | 0.90                      | 0.67                       | 1.00        | 0.95                      | 0.87                       | 1.00        | 0.96                     | 1.00                        | -0.13                                      | 0.49                         | 0.38                         | 1.00          |
| BC residential heating               | 0.04                      | 0.15                       | -0.04       | 0.07                      | 0.33                       | -0.04       | -0.09                    | -0.13                       | 1.00                                       | -0.06                        | 0.23                         | -0.13         |



**Umeå VIP**

|                                      | Total<br>PM <sub>10</sub> | Total<br>PM <sub>2.5</sub> | Total<br>BC | Local<br>PM <sub>10</sub> | Local<br>PM <sub>2.5</sub> | Local<br>BC | PM <sub>10</sub><br>wear | PM <sub>10</sub><br>exhaust | PM <sub>10</sub><br>residential<br>heating | PM <sub>10</sub><br>shipping | PM <sub>10</sub><br>industry | BC<br>traffic |
|--------------------------------------|---------------------------|----------------------------|-------------|---------------------------|----------------------------|-------------|--------------------------|-----------------------------|--------------------------------------------|------------------------------|------------------------------|---------------|
| Total PM <sub>10</sub>               | 1.00                      |                            |             |                           |                            |             |                          |                             |                                            |                              |                              |               |
| Total PM <sub>2.5</sub>              | 0.97                      | 1.00                       |             |                           |                            |             |                          |                             |                                            |                              |                              |               |
| Total BC                             | 0.65                      | 0.53                       | 1.00        |                           |                            |             |                          |                             |                                            |                              |                              |               |
| Local PM <sub>10</sub>               | 0.52                      | 0.47                       | 0.83        | 1.00                      |                            |             |                          |                             |                                            |                              |                              |               |
| Local PM <sub>2.5</sub>              | 0.49                      | 0.53                       | 0.69        | 0.93                      | 1.00                       |             |                          |                             |                                            |                              |                              |               |
| Local BC                             | 0.60                      | 0.58                       | 0.84        | 0.97                      | 0.95                       | 1.00        |                          |                             |                                            |                              |                              |               |
| PM <sub>10</sub> wear                | 0.48                      | 0.30                       | 0.91        | 0.68                      | 0.45                       | 0.60        | 1.00                     |                             |                                            |                              |                              |               |
| PM <sub>10</sub> traffic exhaust     | 0.60                      | 0.43                       | 0.95        | 0.68                      | 0.45                       | 0.66        | 0.96                     | 1.00                        |                                            |                              |                              |               |
| PM <sub>10</sub> residential heating | 0.20                      | 0.33                       | 0.26        | 0.50                      | 0.76                       | 0.52        | 0.04                     | 0.01                        | 1.00                                       |                              |                              |               |
| PM <sub>10</sub> shipping            | 0.01                      | 0.08                       | -0.03       | 0.11                      | 0.19                       | 0.12        | -0.05                    | -0.12                       | 0.20                                       | 1.00                         |                              |               |
| PM <sub>10</sub> industry            | 0.23                      | 0.30                       | 0.06        | 0.28                      | 0.34                       | 0.27        | 0.02                     | -0.05                       | 0.11                                       | 0.32                         | 1.00                         |               |
| BC traffic exhaust                   | 0.59                      | 0.42                       | 0.95        | 0.66                      | 0.43                       | 0.65        | 0.94                     | 1.00                        | 0.00                                       | -0.11                        | -0.05                        | 1.00          |
| BC residential heating               | 0.24                      | 0.35                       | 0.32        | 0.54                      | 0.79                       | 0.60        | 0.08                     | 0.05                        | 0.97                                       | 0.16                         | 0.13                         | 0.04          |

**Table S3. Associations between long-term air pollution and incident ischemic heart disease (IHD) per interquartile range increase (IQR): Comparing estimates between main models and sensitivity analyses adjusted for BMI and BMI<sup>2</sup>**

| Pollutant                            | Outcome | IQR  | Exposure period | Model   | Hazard Ratio | Lower Bound | Upper Bound |
|--------------------------------------|---------|------|-----------------|---------|--------------|-------------|-------------|
| Total PM <sub>10</sub>               | IHD     | 3.28 | 0 years         | Main    | 1.006        | 0.966       | 1.048       |
|                                      |         |      |                 | BMI adj | 1.010        | 0.968       | 1.050       |
|                                      |         |      | 1-5 years       | Main    | 1.025        | 0.974       | 1.079       |
|                                      |         |      |                 | BMI adj | 1.026        | 0.974       | 1.081       |
|                                      |         |      | 6-10 years      | Main    | 0.986        | 0.929       | 1.047       |
|                                      |         |      |                 | BMI adj | 0.987        | 0.930       | 1.050       |
| Total PM <sub>2.5</sub>              | IHD     | 1.94 | 0 years         | Main    | 1.030        | 0.984       | 1.79        |
|                                      |         |      |                 | BMI adj | 1.033        | 0.986       | 1.081       |
|                                      |         |      | 1-5 years       | Main    | 1.065        | 0.997       | 1.138       |
|                                      |         |      |                 | BMI adj | 1.069        | 1.000       | 1.142       |
|                                      |         |      | 6-10 years      | Main    | 0.975        | 0.902       | 1.055       |
|                                      |         |      |                 | BMI adj | 0.981        | 0.907       | 1.061       |
| Total BC                             | IHD     | 0.31 | 0 years         | Main    | 1.002        | 0.973       | 1.032       |
|                                      |         |      |                 | BMI adj | 1.002        | 0.973       | 1.033       |
|                                      |         |      | 1-5 years       | Main    | 0.989        | 0.958       | 1.021       |
|                                      |         |      |                 | BMI adj | 0.990        | 0.959       | 1.023       |
|                                      |         |      | 6-10 years      | Main    | 1.004        | 0.971       | 1.039       |
|                                      |         |      |                 | BMI adj | 1.006        | 0.972       | 1.040       |
| Local PM <sub>2.5</sub>              | IHD     | 1.12 | 0 years         | Main    | 1.019        | 0.979       | 1.062       |
|                                      |         |      |                 | BMI adj | 1.021        | 0.980       | 1.064       |
|                                      |         |      | 1-5 years       | Main    | 1.003        | 0.958       | 1.049       |
|                                      |         |      |                 | BMI adj | 1.006        | 0.961       | 1.053       |
|                                      |         |      | 6-10 years      | Main    | 1.014        | 0.964       | 1.066       |
|                                      |         |      |                 | BMI adj | 1.019        | 0.968       | 1.072       |
| PM <sub>10</sub> traffic exhaust     | IHD     | 0.23 | 0 years         | Main    | 0.998        | 0.971       | 1.025       |
|                                      |         |      |                 | BMI adj | 0.997        | 0.970       | 1.025       |
|                                      |         |      | 1-5 years       | Main    | 0.987        | 0.958       | 1.016       |
|                                      |         |      |                 | BMI adj | 1.012        | 0.984       | 1.040       |
|                                      |         |      | 6-10 years      | Main    | 1.000        | 0.972       | 1.030       |
|                                      |         |      |                 | BMI adj | 1.000        | 0.972       | 1.029       |
| PM <sub>10</sub> residential heating | IHD     | 0.52 | 0 years         | Main    | 1.055        | 1.010       | 1.102       |
|                                      |         |      |                 | BMI adj | 1.057        | 1.012       | 1.105       |
|                                      |         |      | 1-5 years       | Main    | 1.045        | 0.992       | 1.101       |
|                                      |         |      |                 | BMI adj | 1.011        | 0.957       | 1.068       |
|                                      |         |      | 6-10 years      | Main    | 1.025        | 0.964       | 1.091       |
|                                      |         |      |                 | BMI adj | 1.033        | 0.970       | 1.101       |

**Table S4. Associations between long-term air pollution and incident stroke per interquartile range increase (IQR): Comparing estimates between main models and sensitivity analyses adjusted for BMI and BMI<sup>2</sup>**

| <b>Pollutant</b>        | <b>Outcome</b> | <b>IQR</b> | <b>Exposure period</b> | <b>Model</b> | <b>Hazard Ratio</b> | <b>Lower Bound</b> | <b>Upper Bound</b> |
|-------------------------|----------------|------------|------------------------|--------------|---------------------|--------------------|--------------------|
| Total PM <sub>10</sub>  | Stroke         | 3.28       | 0 years                | Main         | 1.008               | 0.957              | 1.062              |
|                         |                |            |                        | BMI adj      | 1.010               | 0.958              | 1.064              |
|                         |                |            | 1-5 years              | Main         | 1.026               | 0.962              | 1.093              |
|                         |                |            |                        | BMI adj      | 1.030               | 0.968              | 1.098              |
|                         |                |            | 6-10 years             | Main         | 1.010               | 0.941              | 1.084              |
|                         |                |            |                        | BMI adj      | 1.013               | 0.945              | 1.088              |
| Total PM <sub>2.5</sub> | Stroke         | 1.94       | 0 years                | Main         | 1.006               | 0.948              | 1.067              |
|                         |                |            |                        | BMI adj      | 1.008               | 0.950              | 1.069              |
|                         |                |            | 1-5 years              | Main         | 1.030               | 0.947              | 1.120              |
|                         |                |            |                        | BMI adj      | 1.037               | 0.954              | 1.130              |
|                         |                |            | 6-10 years             | Main         | 1.016               | 0.924              | 1.117              |
|                         |                |            |                        | BMI adj      | 1.018               | 0.924              | 1.118              |
| Total BC                | Stroke         | 0.31       | 0 years                | Main         | 1.041               | 1.004              | 1.080              |
|                         |                |            |                        | BMI adj      | 1.044               | 1.006              | 1.083              |
|                         |                |            | 1-5 years              | Main         | 1.032               | 0.994              | 1.071              |
|                         |                |            |                        | BMI adj      | 1.035               | 0.997              | 1.075              |
|                         |                |            | 6-10 years             | Main         | 1.027               | 0.987              | 1.068              |
|                         |                |            |                        | BMI adj      | 1.029               | 0.989              | 1.070              |
| Local BC                | Stroke         | 0.3        | 0 years                | Main         | 1.040               | 1.004              | 1.078              |
|                         |                |            |                        | BMI adj      | 1.042               | 1.006              | 1.080              |
|                         |                |            | 1-5 years              | Main         | 1.031               | 0.994              | 1.069              |
|                         |                |            |                        | BMI adj      | 1.034               | 0.997              | 1.073              |
|                         |                |            | 6-10 years             | Main         | 1.026               | 0.988              | 1.066              |
|                         |                |            |                        | BMI adj      | 1.028               | 0.990              | 1.067              |
| BC traffic exhaust      | Stroke         | 0.26       | 0 years                | Main         | 1.044               | 1.011              | 1.078              |
|                         |                |            |                        | BMI adj      | 1.009               | 1.002              | 1.015              |
|                         |                |            | 1-5 years              | Main         | 1.035               | 1.002              | 1.070              |
|                         |                |            |                        | BMI adj      | 1.007               | 1.001              | 1.014              |
|                         |                |            | 6-10 years             | Main         | 1.027               | 0.992              | 1.063              |
|                         |                |            |                        | BMI adj      | 1.005               | 0.999              | 1.012              |
| BC residential heating  | Stroke         | 0.05       | 0 years                | Main         | 0.995               | 0.945              | 1.047              |
|                         |                |            |                        | BMI adj      | 0.976               | 0.750              | 1.271              |
|                         |                |            | 1-5 years              | Main         | 0.993               | 0.935              | 1.055              |
|                         |                |            |                        | BMI adj      | 0.968               | 0.710              | 1.321              |
|                         |                |            | 6-10 years             | Main         | 0.996               | 0.926              | 1.072              |
|                         |                |            |                        | BMI adj      | 0.967               | 0.666              | 1.404              |

**Table S5. Associations between long-term air pollution and incident ischemic heart disease (IHD) per interquartile range increase (IQR): Comparing estimates between main models and sensitivity analyses excluding the PPS cohort**

| <b>Pollutant</b>                     | <b>Outcome</b> | <b>IQR</b> | <b>Exposure period</b> | <b>Model</b> | <b>Hazard Ratio</b> | <b>Lower Bound</b> | <b>Upper Bound</b> |
|--------------------------------------|----------------|------------|------------------------|--------------|---------------------|--------------------|--------------------|
| Total PM <sub>10</sub>               | IHD            | 3.28       | 0 years                | Main         | 1.006               | 0.966              | 1.048              |
|                                      |                |            |                        | No PPS       | 0.990               | 0.933              | 1.053              |
|                                      |                |            | 1-5 years              | Main         | 1.025               | 0.974              | 1.079              |
|                                      |                |            |                        | No PPS       | 0.990               | 0.927              | 1.060              |
|                                      |                |            | 6-10 years             | Main         | 0.986               | 0.929              | 1.047              |
|                                      |                |            |                        | No PPS       | 1.010               | 0.942              | 1.084              |
| Total PM <sub>2.5</sub>              | IHD            | 1.94       | 0 years                | Main         | 1.030               | 0.984              | 1.79               |
|                                      |                |            |                        | No PPS       | 1.045               | 0.973              | 1.120              |
|                                      |                |            | 1-5 years              | Main         | 1.065               | 0.997              | 1.138              |
|                                      |                |            |                        | No PPS       | 1.008               | 0.920              | 1.105              |
|                                      |                |            | 6-10 years             | Main         | 0.975               | 0.902              | 1.055              |
|                                      |                |            |                        | No PPS       | 1.018               | 0.922              | 1.122              |
| Total BC                             | IHD            | 0.31       | 0 years                | Main         | 1.002               | 0.973              | 1.032              |
|                                      |                |            |                        | No PPS       | 0.990               | 0.948              | 1.035              |
|                                      |                |            | 1-5 years              | Main         | 0.989               | 0.958              | 1.021              |
|                                      |                |            |                        | No PPS       | 0.994               | 0.954              | 1.037              |
|                                      |                |            | 6-10 years             | Main         | 1.004               | 0.971              | 1.039              |
|                                      |                |            |                        | No PPS       | 1.002               | 0.963              | 1.043              |
| Local PM <sub>2.5</sub>              | IHD            | 1.12       | 0 years                | Main         | 1.019               | 0.979              | 1.062              |
|                                      |                |            |                        | No PPS       | 1.009               | 0.952              | 1.067              |
|                                      |                |            | 1-5 years              | Main         | 1.003               | 0.958              | 1.049              |
|                                      |                |            |                        | No PPS       | 1.010               | 0.952              | 1.072              |
|                                      |                |            | 6-10 years             | Main         | 1.014               | 0.964              | 1.066              |
|                                      |                |            |                        | No PPS       | 1.017               | 0.956              | 1.080              |
| PM <sub>10</sub> traffic exhaust     | IHD            | 0.23       | 0 years                | Main         | 0.998               | 0.971              | 1.025              |
|                                      |                |            |                        | No PPS       | 0.987               | 0.946              | 1.030              |
|                                      |                |            | 1-5 years              | Main         | 0.987               | 0.958              | 1.016              |
|                                      |                |            |                        | No PPS       | 0.992               | 0.954              | 1.032              |
|                                      |                |            | 6-10 years             | Main         | 1.000               | 0.972              | 1.030              |
|                                      |                |            |                        | No PPS       | 0.997               | 0.964              | 1.032              |
| PM <sub>10</sub> residential heating | IHD            | 0.52       | 0 years                | Main         | 1.055               | 1.010              | 1.102              |
|                                      |                |            |                        | No PPS       | 1.045               | 0.987              | 1.106              |
|                                      |                |            | 1-5 years              | Main         | 1.045               | 0.992              | 1.101              |
|                                      |                |            |                        | No PPS       | 1.038               | 0.973              | 1.108              |
|                                      |                |            | 6-10 years             | Main         | 1.025               | 0.964              | 1.091              |
|                                      |                |            |                        | No PPS       | 1.038               | 0.966              | 1.117              |

**Table S6. Associations between long-term air pollution and incident stroke per interquartile range increase (IQR): Comparing estimates between main models and sensitivity analyses excluding the PPS cohort**

| <b>Pollutant</b>        | <b>Outcome</b> | <b>IQR</b> | <b>Exposure period</b> | <b>Model</b> | <b>Hazard Ratio</b> | <b>Lower Bound</b> | <b>Upper Bound</b> |
|-------------------------|----------------|------------|------------------------|--------------|---------------------|--------------------|--------------------|
| Total PM <sub>10</sub>  | Stroke         | 3.28       | 0 years                | Main         | 1.008               | 0.957              | 1.062              |
|                         |                |            |                        | No PPS       | 1.053               | 0.977              | 1.137              |
|                         |                |            | 1-5 years              | Main         | 1.026               | 0.962              | 1.093              |
|                         |                |            |                        | No PPS       | 1.026               | 0.942              | 1.116              |
|                         |                |            | 6-10 years             | Main         | 1.010               | 0.941              | 1.084              |
|                         |                |            |                        | No PPS       | 1.040               | 0.958              | 1.130              |
| Total PM <sub>2.5</sub> | Stroke         | 1.94       | 0 years                | Main         | 1.006               | 0.948              | 1.067              |
|                         |                |            |                        | No PPS       | 1.063               | 0.971              | 1.165              |
|                         |                |            | 1-5 years              | Main         | 1.030               | 0.947              | 1.120              |
|                         |                |            |                        | No PPS       | 1.035               | 0.918              | 1.165              |
|                         |                |            | 6-10 years             | Main         | 1.016               | 0.924              | 1.117              |
|                         |                |            |                        | No PPS       | 1.075               | 0.952              | 1.212              |
| Total BC                | Stroke         | 0.31       | 0 years                | Main         | 1.041               | 1.004              | 1.080              |
|                         |                |            |                        | No PPS       | 1.052               | 0.998              | 1.109              |
|                         |                |            | 1-5 years              | Main         | 1.032               | 0.994              | 1.071              |
|                         |                |            |                        | No PPS       | 1.035               | 0.986              | 1.087              |
|                         |                |            | 6-10 years             | Main         | 1.027               | 0.987              | 1.068              |
|                         |                |            |                        | No PPS       | 1.033               | 0.986              | 1.081              |
| Local BC                | Stroke         | 0.3        | 0 years                | Main         | 1.040               | 1.004              | 1.078              |
|                         |                |            |                        | No PPS       | 1.050               | 0.998              | 1.105              |
|                         |                |            | 1-5 years              | Main         | 1.031               | 0.994              | 1.069              |
|                         |                |            |                        | No PPS       | 1.034               | 0.986              | 1.084              |
|                         |                |            | 6-10 years             | Main         | 1.026               | 0.988              | 1.066              |
|                         |                |            |                        | No PPS       | 1.032               | 0.987              | 1.078              |
| BC traffic exhaust      | Stroke         | 0.26       | 0 years                | Main         | 1.044               | 1.011              | 1.078              |
|                         |                |            |                        | No PPS       | 1.052               | 1.005              | 1.101              |
|                         |                |            | 1-5 years              | Main         | 1.035               | 1.002              | 1.070              |
|                         |                |            |                        | No PPS       | 1.035               | 0.992              | 1.080              |
|                         |                |            | 6-10 yrs               | Main         | 1.027               | 0.992              | 1.063              |
|                         |                |            |                        | No PPS       | 1.032               | 0.993              | 1.074              |
| BC residential heating  | Stroke         | 0.05       | 0 years                | Main         | 0.995               | 0.945              | 1.047              |
|                         |                |            |                        | No PPS       | 1.019               | 0.952              | 1.089              |
|                         |                |            | 1-5 years              | Main         | 0.993               | 0.935              | 1.055              |
|                         |                |            |                        | No PPS       | 1.028               | 0.953              | 1.109              |
|                         |                |            | 6-10 years             | Main         | 0.996               | 0.926              | 1.072              |
|                         |                |            |                        | No PPS       | 0.983               | 0.900              | 1.073              |

**Table S7. Associations between same year exposure to BC and incident stroke by level of potential effect modifiers**

| Characteristic                 | Level of characteristic              | Hazard ratio | 95% CI     | P-value for interaction <sup>a</sup> |
|--------------------------------|--------------------------------------|--------------|------------|--------------------------------------|
| Sex                            | Women                                | 1.18         | 0.79, 1.77 | 0.93                                 |
|                                | Men                                  | 1.21         | 0.99, 1.47 |                                      |
| Smoking status                 | Never smoker                         | 1.24         | 0.96, 1.62 | 0.45                                 |
|                                | Ever smoker                          | 1.11         | 0.96, 1.28 |                                      |
| Educational level <sup>b</sup> | University degree or more            | 1.17         | 0.93, 1.49 | 0.50                                 |
|                                | Up to secondary school or equivalent | 1.04         | 0.80, 1.35 |                                      |
| Body mass index                | ≤25 kg/m <sup>2</sup>                | 1.08         | 0.91, 1.27 | 0.67 <sup>c</sup>                    |
|                                | 25-30 kg/m <sup>2</sup>              | 1.20         | 1.01, 1.43 |                                      |
|                                | ≥30 kg/m <sup>2</sup>                | 1.30         | 0.94, 1.81 |                                      |

a. Cohort analyses including terms for main effect of effect modifier, main effect of BC and their product was first calculated to derive stratum specific results per cohort. These were then meta-analyzed to arrive at hazard ratios and confidence intervals per level of characteristic. The p-value for interaction was calculated by taking the difference in betas across level of characteristic and dividing it by the square root of the sum of squared standard errors for each level. This gave us a normal standard that was checked against percentiles to arrive at the p-value.

b. Does not include Gothenburg PPS cohort for which variable was unavailable.

c. Compared to ≤25 kg/m<sup>2</sup>

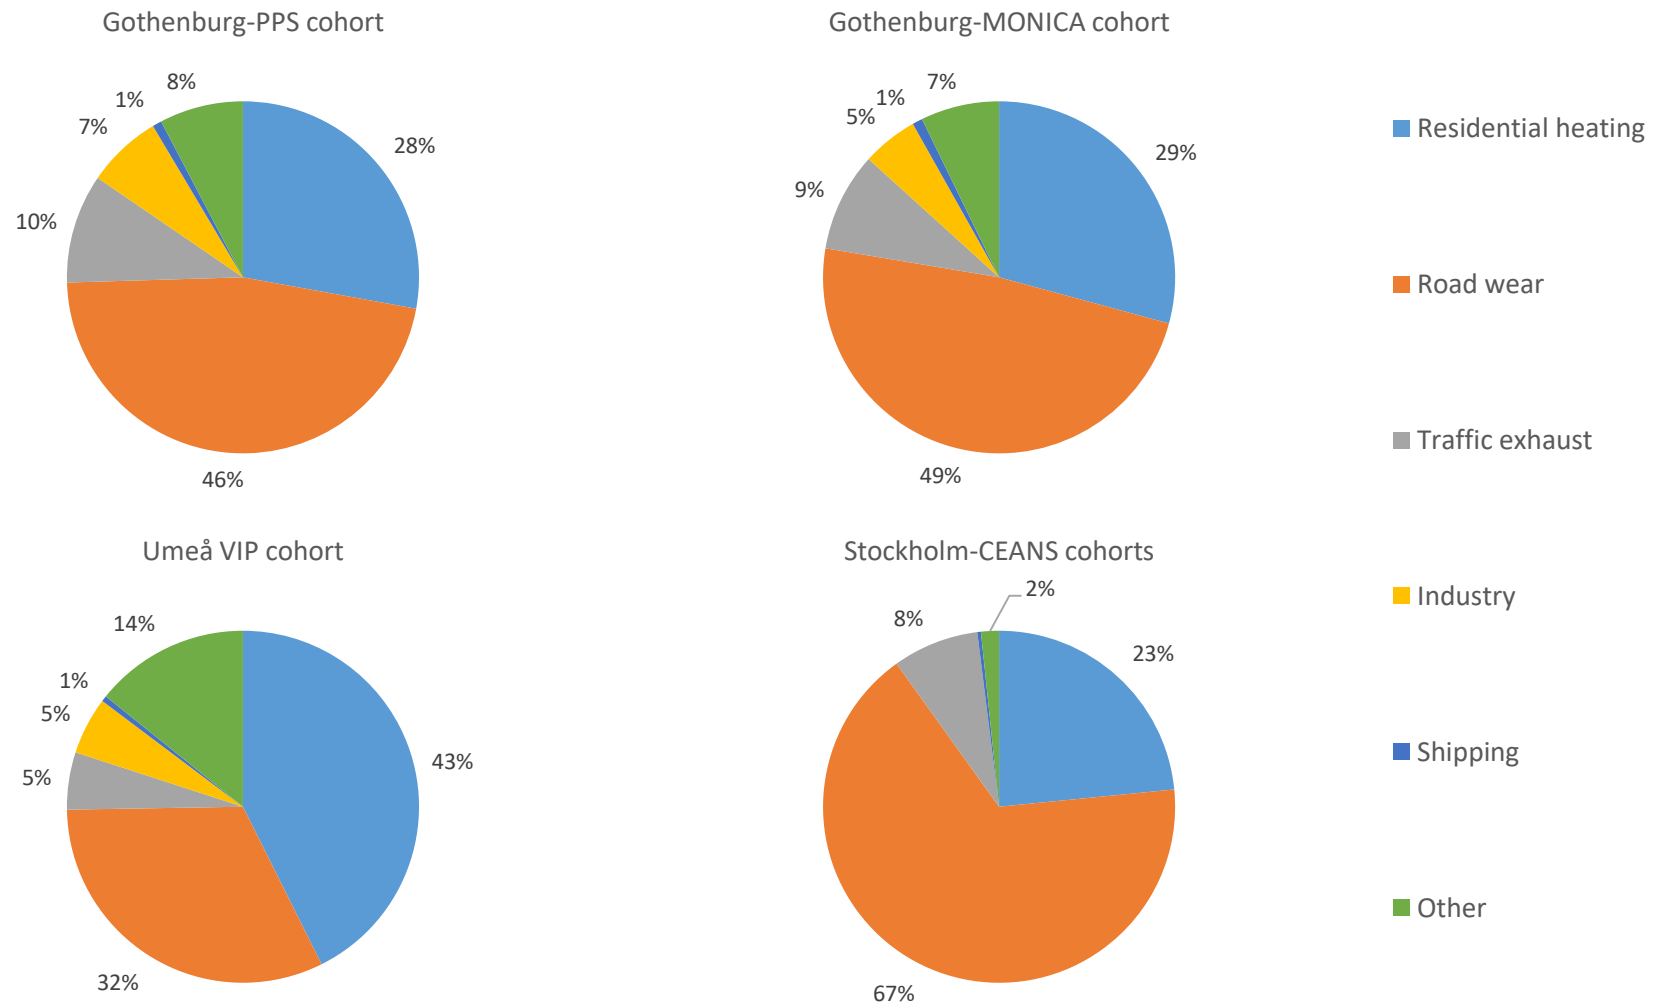

Figure S1 Local source contributions to residential PM<sub>10</sub> levels by study

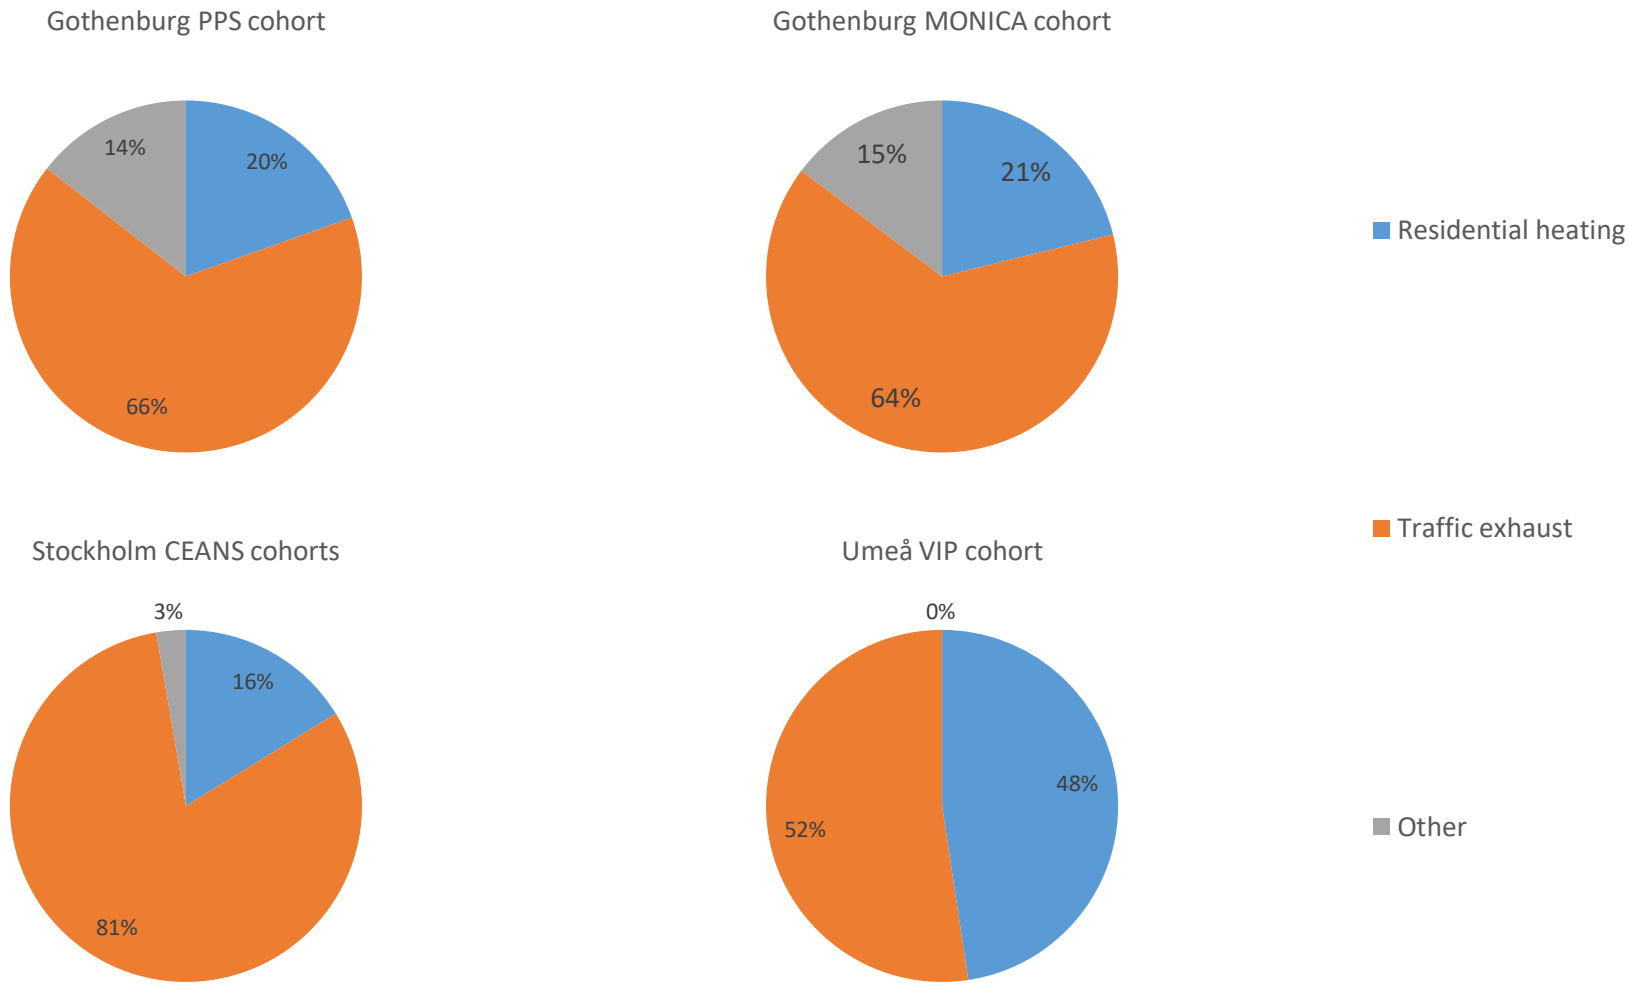

Figure S2 Local source contributions to residential BC levels by study



# Total PM<sub>10</sub> Exposure and incident IHD

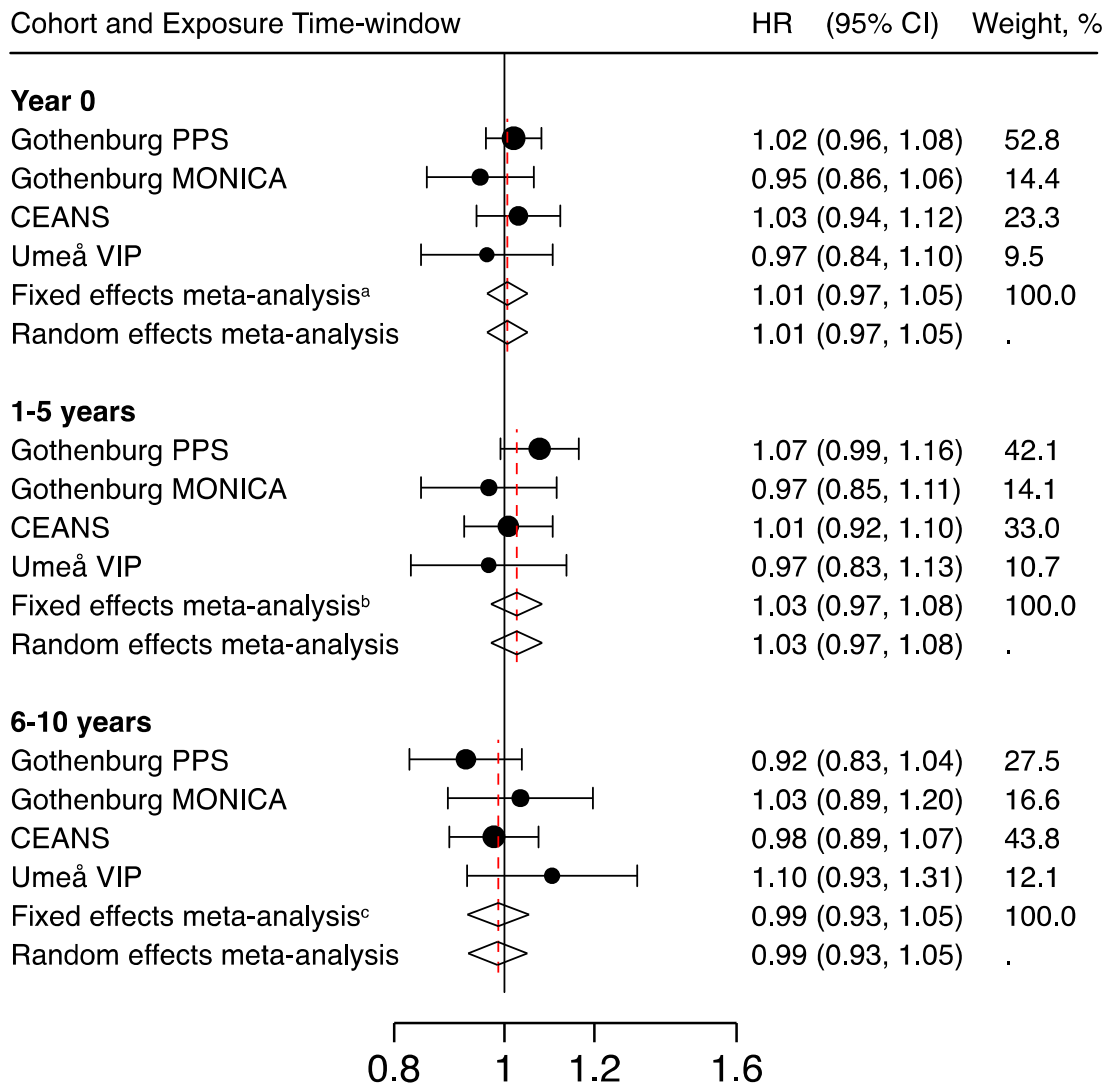

**Figure S3.** City-specific and overall meta-analyses estimates for associations between same year, 1-5 year, and 6-10 year average of total PM<sub>10</sub> exposure and incident ischemic heart disease. Hazard ratios and 95% confidence intervals per 3.28 µg/m<sup>3</sup> PM<sub>10</sub>. Fixed effects meta-analyses used inverse variance weighted estimates. Random effects meta-analyses used a DerSimonian and Laird methodology. I-squared statistics and p-value for the chi-squared test of significance of the hazard ratio for the fixed effect models for each time-window were as follows: <sup>a</sup> 0.0%, p=0.606, <sup>b</sup> 0.0%, p=0.458, <sup>c</sup> 6.6%, p=0.360. I-squared statistic is the percentage of variation attributable to heterogeneity.

# Total PM<sub>2.5</sub> Exposure and Incident IHD

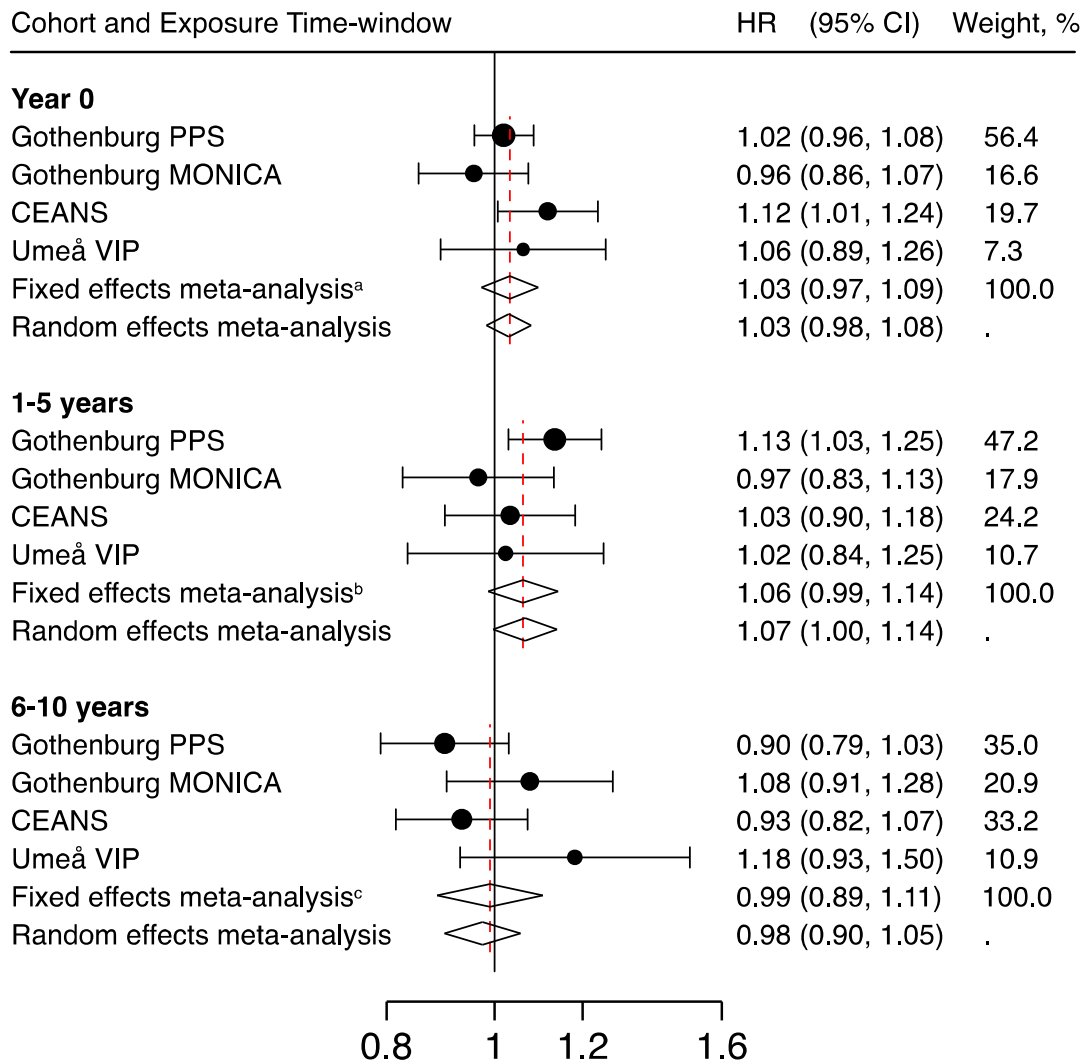

**Figure S4.** City-specific and overall meta-analyses estimates for associations between same year, 1-5 year, and 6-10 year average of total PM<sub>2.5</sub> exposure and incident ischemic heart disease. Hazard ratios and 95% confidence intervals per 1.94 µg/m<sup>3</sup> PM<sub>2.5</sub>. Fixed effects meta-analyses used inverse variance weighted estimates. Random effects meta-analyses used a DerSimonian and Laird methodology. I-squared statistics and p-value for the chi-squared test of significance of the hazard ratio for the fixed effect models for each time-window were as follows: <sup>a</sup> 27.4%, p=0.247, <sup>b</sup> 11.5%, p=0.335, <sup>c</sup> 45.1%, p=0.141. I-squared statistic is the percentage of variation attributable to heterogeneity.

# Total BC Exposure and Incident IHD

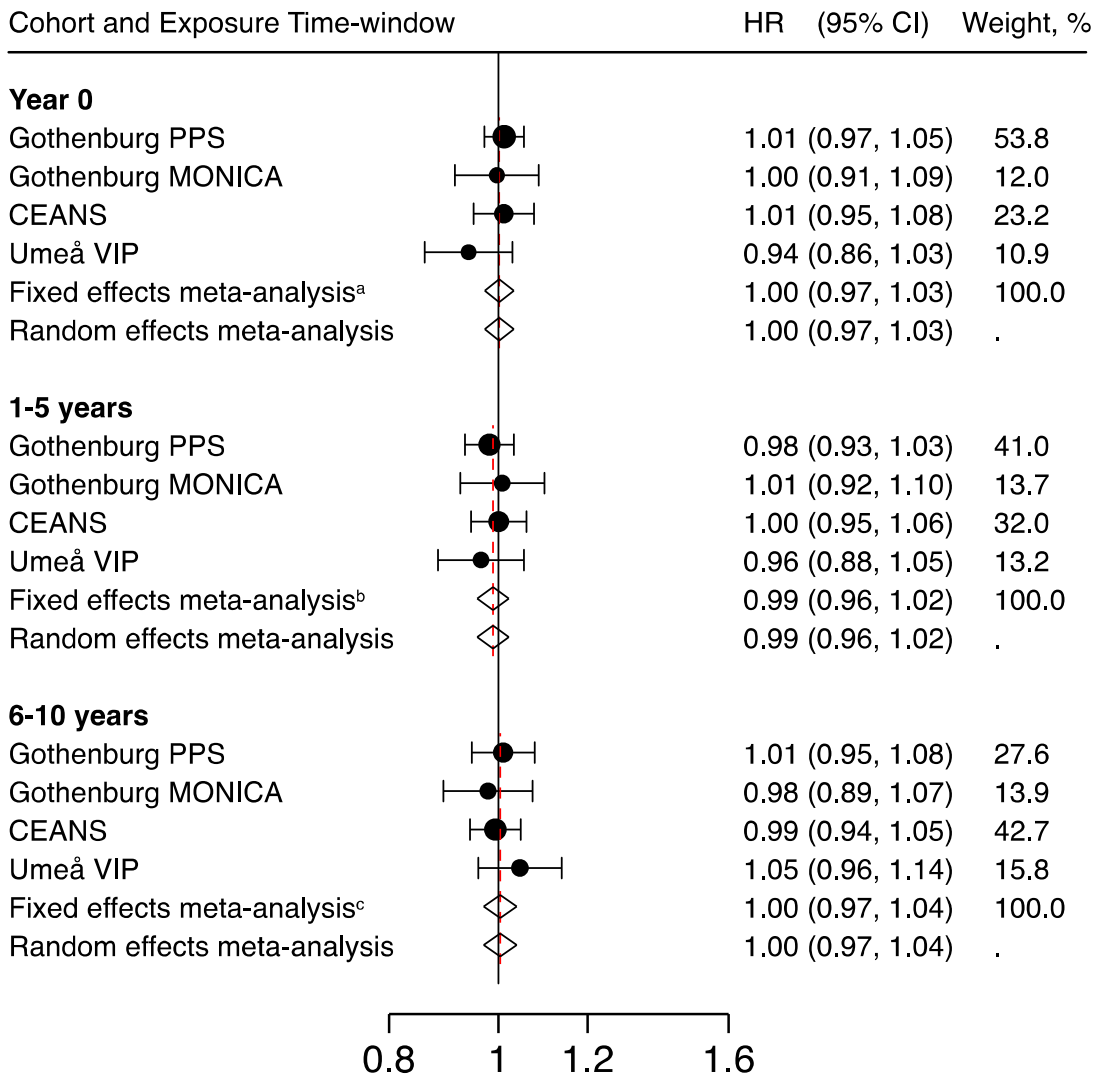

**Figure S5.** City-specific and overall meta-analyses estimates for associations between same year, 1-5 year, and 6-10 year average of total BC exposure and incident ischemic heart disease. Hazard ratios and 95% confidence intervals per 0.31  $\mu\text{g}/\text{m}^3$  BC. Fixed effects meta-analyses used inverse variance weighted estimates. Random effects meta-analyses used a DerSimonian and Laird methodology. I-squared statistics and p-value for the chi-squared test of significance of the hazard ratio for the fixed effect models for each time-window were as follows: <sup>a</sup> 0.0%,  $p=0.530$ , <sup>b</sup> 0.0%,  $p=0.866$ , <sup>c</sup> 0.0%,  $p=0.722$ . I-squared statistic is the percentage of variation attributable to heterogeneity.

## Same Year Exposure to PM from Residential Heating and Incident IHD

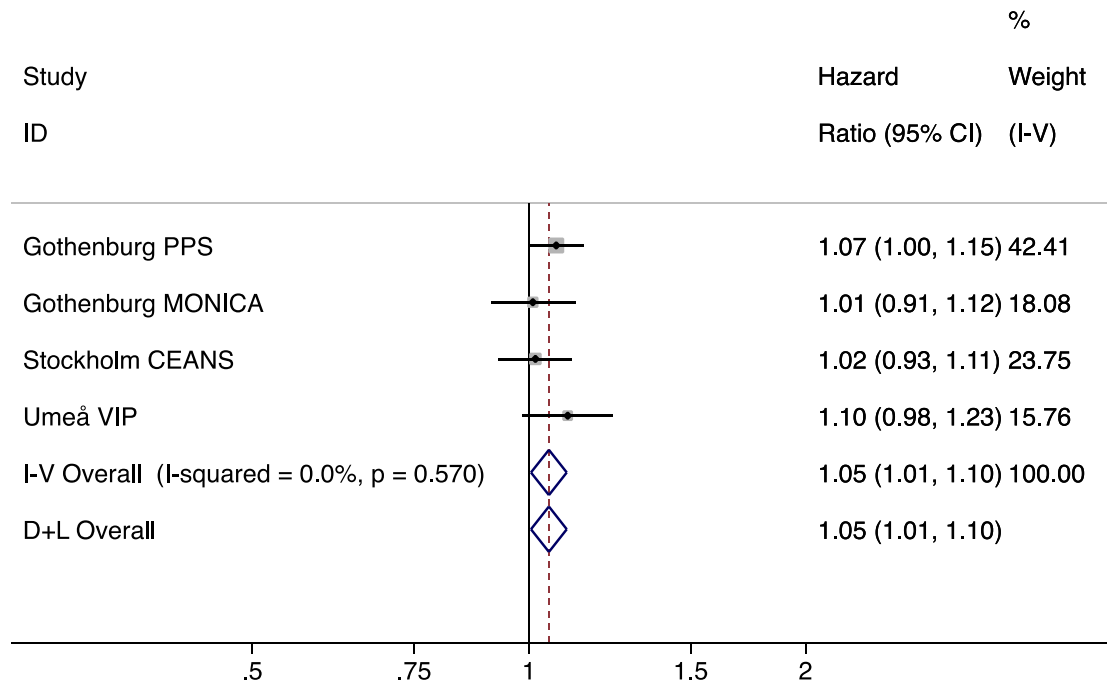

**Figure S6.** City-specific and overall meta-analyses estimates for associations between same year average  $PM_{2.5}$  levels from residential heating sources and incident ischemic heart disease. Hazard ratios and 95% confidence intervals per  $0.52 \mu\text{g}/\text{m}^3$   $PM_{2.5}$  from residential heating sources. I-V, inverse variance weighted fixed-effects meta-analyses. I-squared statistic is the percentage of variation attributable to heterogeneity. P-value for the chi-squared test of significance of hazard ratio of fixed-effect model. D+L, DerSimonian and Laird random-effects estimates.

## Total PM<sub>10</sub> Exposure and Incident Stroke

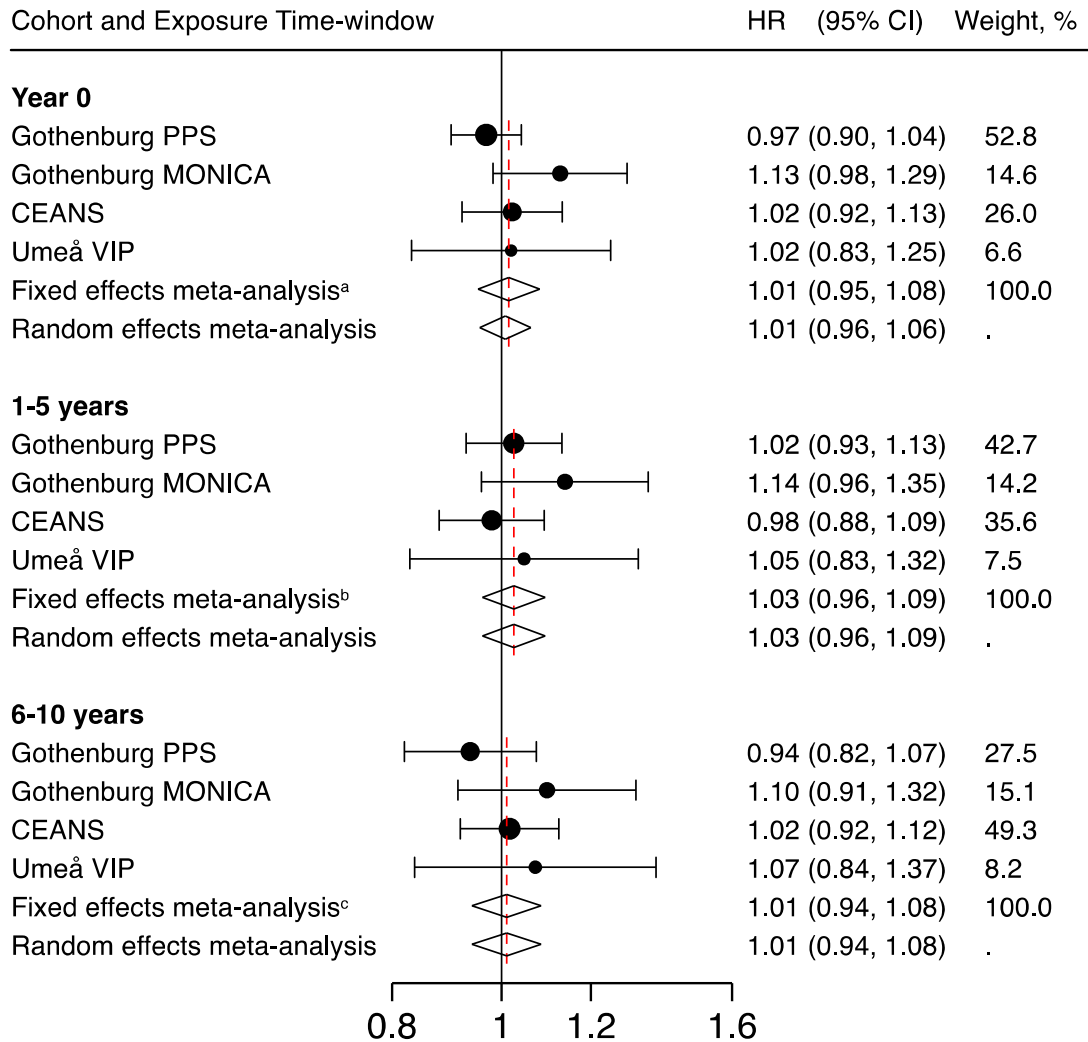

**Figure S7.** City-specific and overall meta-analyses estimates for associations between same year, 1-5 year, and 6-10 year average of total PM<sub>10</sub> exposure and incident stroke. Hazard ratios and 95% confidence intervals per 3.28 µg/m<sup>3</sup> PM<sub>10</sub>. Fixed effects meta-analyses used inverse variance weighted estimates. Random effects meta-analyses used a DerSimonian and Laird methodology. I-squared statistics and p-value for the chi-squared test of significance of the hazard ratio for the fixed effect models for each time-window were as follows: <sup>a</sup> 21.5%, p=0.281, <sup>b</sup> 0.0%, p=0.540, <sup>c</sup> 0.0%, p=0.533. I-squared statistic is the percentage of variation attributable to heterogeneity.

## Total PM<sub>2.5</sub> Exposure and Incident Stroke

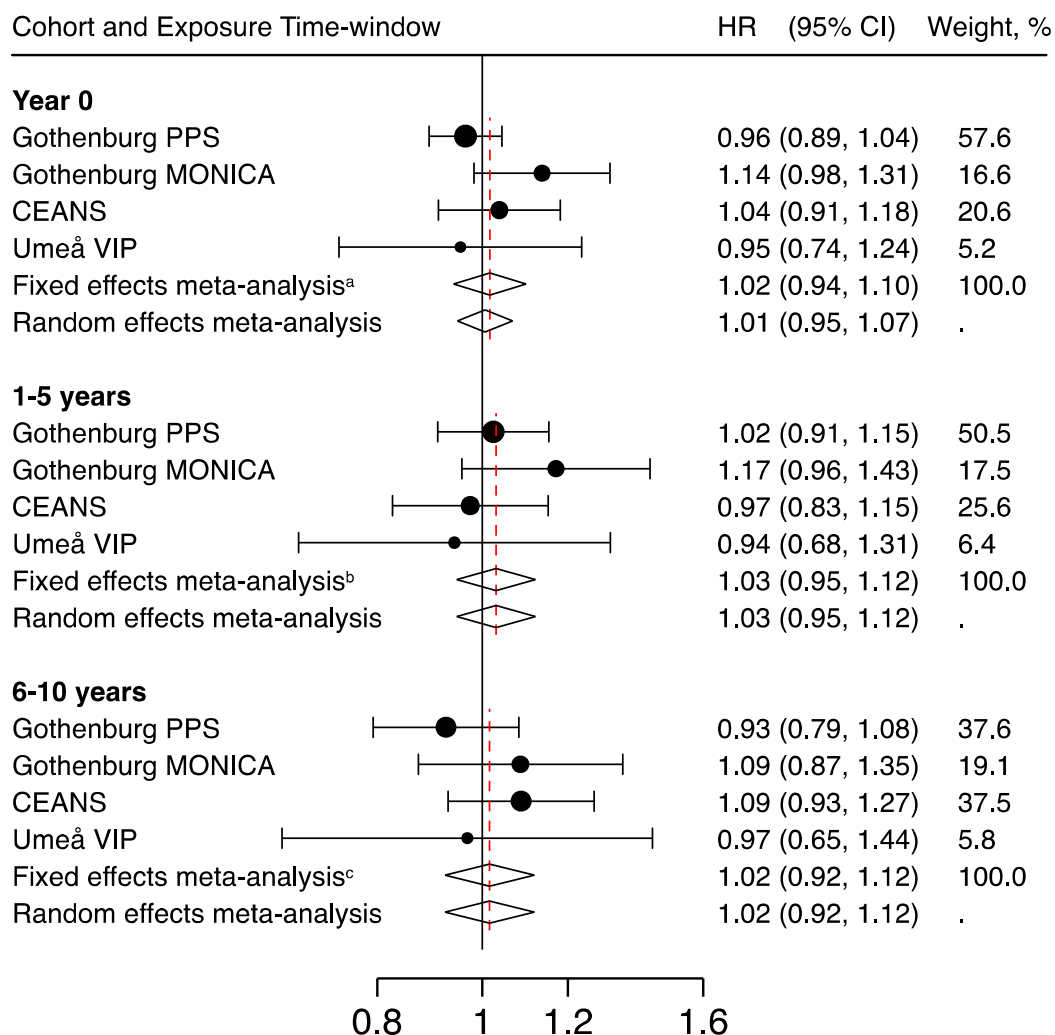

**Figure S8.** City-specific and overall meta-analyses estimates for associations between same year, 1-5 year, and 6-10 year average of total PM<sub>2.5</sub> exposure and incident stroke. Hazard ratios and 95% confidence intervals per 1.94  $\mu\text{g}/\text{m}^3$  PM<sub>2.5</sub>. Fixed effects meta-analyses used inverse variance weighted estimates. Random effects meta-analyses used a DerSimonian and Laird methodology. I-squared statistics and p-value for the chi-squared test of significance of the hazard ratio for the fixed effect models for each time-window were as follows: <sup>a</sup> 28.5%, p=0.241, <sup>b</sup> 0.0%, p=0.518, <sup>c</sup> 0.0%, p=0.476. I-squared statistic is the percentage of variation attributable to heterogeneity.

# Total BC Exposure and Incident Stroke

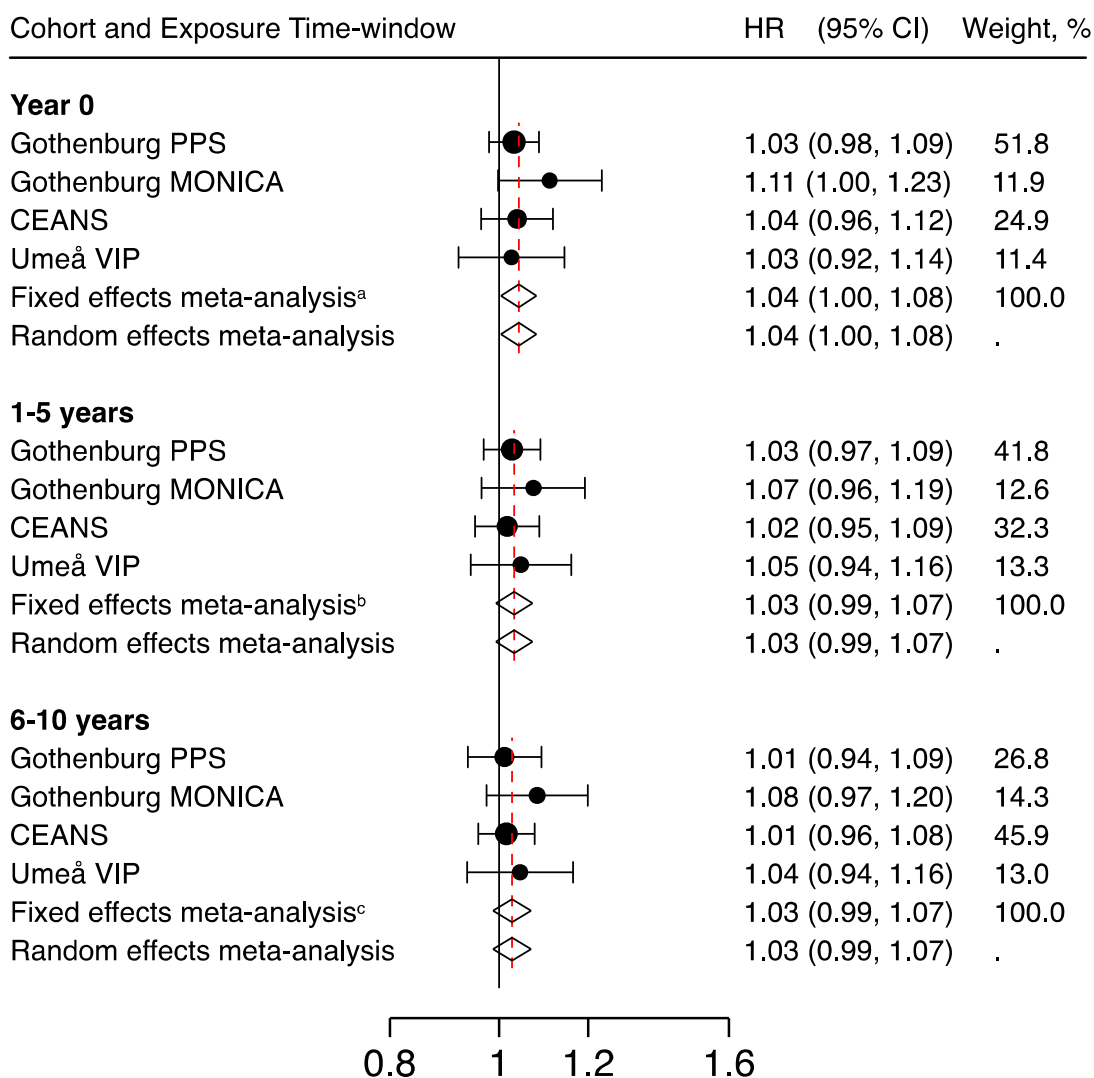

**Figure S9.** City-specific and overall meta-analyses estimates for associations between same year, 1-5 year, and 6-10 year average of total BC exposure and incident stroke. Hazard ratios and 95% confidence intervals per  $0.31 \mu\text{g}/\text{m}^3$  BC. Fixed effects meta-analyses used inverse variance weighted estimates. Random effects meta-analyses used a DerSimonian and Laird methodology. I-squared statistics and p-value for the chi-squared test of significance of the hazard ratio for the fixed effect models for each time-window were as follows: <sup>a</sup> 0.0%,  $p=0.663$ , <sup>b</sup> 0.0%,  $p=0.847$ , <sup>c</sup> 0.0%,  $p=0.716$ . I-squared statistic is the percentage of variation attributable to heterogeneity.

## Same Year Exposure to BC from Traffic Exhaust and Incident Stroke

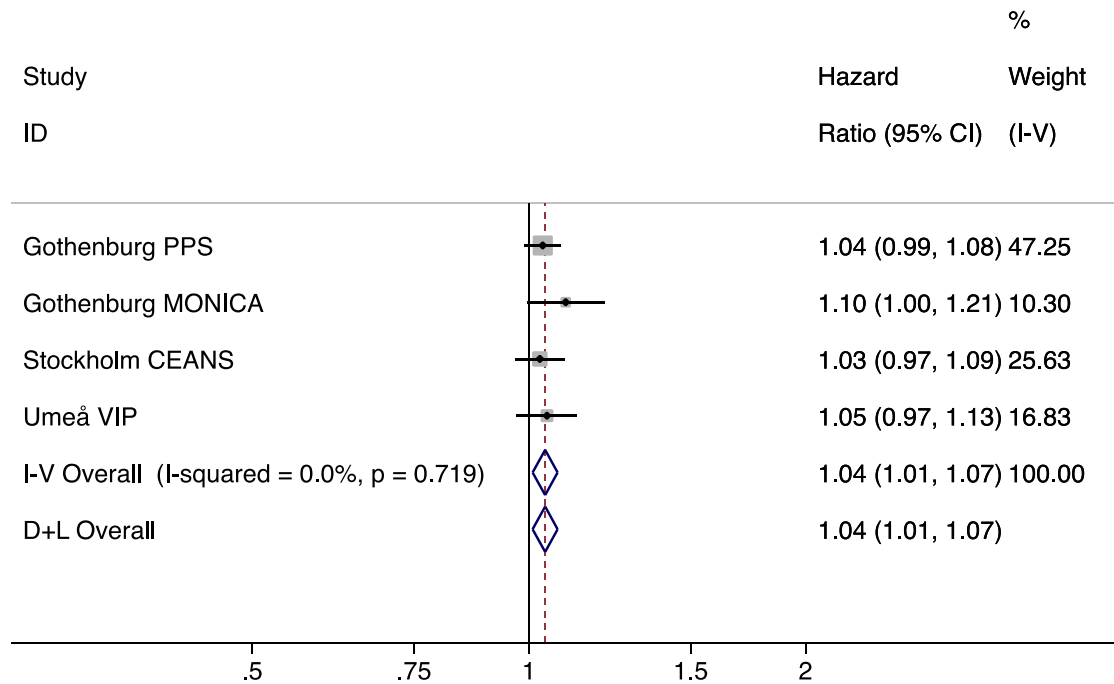

**Figure S10.** City-specific and overall meta-analyses estimates for associations between same year average BC levels from traffic sources and incident stroke. Hazard ratios and 95% confidence intervals per 0.26  $\mu\text{g}/\text{m}^3$  BC from traffic sources. I-V, inverse variance weighted fixed-effects meta-analyses. I-squared statistic is the percentage of variation attributable to heterogeneity. P-value for the chi-squared test of significance of hazard ratio of fixed-effect model. D+L, DerSimonian and Laird random-effects estimates.
