# Supplementary material
Source: PubMed Central journal article supplement (PMC6867232)
Supplement: ehp-127-107012-s002.pdf [file ehp-127-107012-s002.pdf]

**Note to readers with disabilities:** *EHP* strives to ensure that all journal content is accessible to all readers. However, some figures and Supplemental Material published in *EHP* articles may not conform to [508 standards](#) due to the complexity of the information being presented. If you need assistance accessing journal content, please contact [ehp508@niehs.nih.gov](mailto:ehp508@niehs.nih.gov). Our staff will work with you to assess and meet your accessibility needs within 3 working days.

### **Supplemental Material**

#### **Long-Term Exposure to Particulate Air Pollution, Black Carbon, and Their Source Components in Relation to Ischemic Heart Disease and Stroke**

Petter L. S. Ljungman, Niklas Andersson, Leo Stockfelt, Eva M. Andersson, Johan Nilsson Sommar, Kristina Eneroth, Lars Gidhagen, Christer Johansson, Anton Lager, Karin Leander, Peter Molnar, Nancy L. Pedersen, Debora Rizzuto, Annika Rosengren, David Segersson, Patrik Wennberg, Lars Barregard, Bertil Forsberg, Gerd Sallsten, Tom Bellander, and Göran Pershagen

#### **Table of Contents**

**Table S1.** Descriptive data for four sub-cohorts included in Stockholm CEANS.

**Table S2.** Pearson correlation coefficients between pollutants.

**Table S3.** Associations between long-term air pollution and incident ischemic heart disease (IHD) per interquartile range increase (IQR): Comparing estimates between main models and sensitivity analyses adjusted for BMI and BMI<sup>2</sup>.

**Table S4.** Associations between long-term air pollution and incident stroke per interquartile range increase (IQR): Comparing estimates between main models and sensitivity analyses adjusted for BMI and BMI<sup>2</sup>.

**Table S5.** Associations between long-term air pollution and incident ischemic heart disease (IHD) per interquartile range increase (IQR): Comparing estimates between main models and sensitivity analyses excluding the PPS cohort.

**Table S6.** Associations between long-term air pollution and incident stroke per interquartile range increase (IQR): Comparing estimates between main models and sensitivity analyses excluding the PPS cohort.

**Table S7.** Associations between same year exposure to BC and incident stroke by level of potential effect modifiers.

**Figure S1.** Local source contributions to residential PM<sub>10</sub> levels by study.

**Figure S2.** Local source contributions to residential BC levels by study.

**Figure S3.** City-specific and overall meta-analyses estimates for associations between same year, 1-5 year, and 6-10 year average of total PM<sub>10</sub> exposure and incident ischemic heart disease. Hazard ratios and 95% confidence intervals per 3.28 µg/m<sup>3</sup> PM<sub>10</sub>. Fixed effects meta-analyses used inverse variance weighted estimates. Random effects meta-analyses used a DerSimonian and Laird methodology. I-squared statistics and p-value for the chi-squared test of significance of the hazard ratio for the fixed effect models for each time-window were as follows: <sup>a</sup>0.0%, p=0.606, <sup>b</sup>0.0%, p=0.458, <sup>c</sup>6.6%, p=0.360. I-squared statistic is the percentage of variation attributable to heterogeneity.

**Figure S4.** City-specific and overall meta-analyses estimates for associations between same year, 1-5 year, and 6-10 year average of total PM<sub>2.5</sub> exposure and incident ischemic heart disease. Hazard ratios and 95% confidence intervals per 1.94 µg/m<sup>3</sup> PM<sub>2.5</sub>. Fixed effects meta-analyses used inverse variance weighted estimates. Random effects meta-analyses used a DerSimonian and Laird methodology. I-squared statistics and p-value for the chi-squared test of significance of the hazard ratio for the fixed effect models for each time-window were as follows: <sup>a</sup>27.4%, p=0.247, <sup>b</sup>11.5%, p=0.335, <sup>c</sup>45.1%, p=0.141. I-squared statistic is the percentage of variation attributable to heterogeneity.

**Figure S5.** City-specific and overall meta-analyses estimates for associations between same year, 1-5 year, and 6-10 year average of total BC exposure and incident ischemic heart disease. Hazard ratios and 95% confidence intervals per 0.31 µg/m<sup>3</sup> BC. Fixed effects meta-analyses used inverse variance weighted estimates. Random effects meta-analyses used a DerSimonian and Laird methodology. I-squared statistics and p-value for the chi-squared test of significance of the hazard ratio for the fixed effect models for each time-window were as follows: <sup>a</sup>0.0%, p=0.530, <sup>b</sup>0.0%, p=0.866, <sup>c</sup>0.0%, p=0.722. I-squared statistic is the percentage of variation attributable to heterogeneity.

**Figure S6.** City-specific and overall meta-analyses estimates for associations between same year average PM<sub>2.5</sub> levels from residential heating sources and incident ischemic heart disease. Hazard ratios and 95% confidence intervals per 0.52 µg/m<sup>3</sup> PM<sub>2.5</sub> from residential heating sources. I-V, inverse variance weighted fixed-effects meta-analyses. I-squared statistic is the percentage of variation attributable to heterogeneity. P-value for the chi-squared test of significance of hazard ratio of fixed-effect model. D+L, DerSimonian and Laird random-effects estimates.

**Figure S7.** City-specific and overall meta-analyses estimates for associations between same year, 1-5 year, and 6-10 year average of total PM<sub>10</sub> exposure and incident stroke. Hazard ratios and 95% confidence intervals per 3.28 µg/m<sup>3</sup> PM<sub>10</sub>. Fixed effects meta-analyses used inverse variance weighted estimates. Random effects meta-analyses used a DerSimonian and Laird methodology. I-squared statistics and p-value for the chi-squared test of significance of the hazard ratio for the fixed effect models for each time-window were as follows: <sup>a</sup>21.5%, p=0.281, <sup>b</sup>0.0%, p=0.540, <sup>c</sup>0.0%, p=0.533. I-squared statistic is the percentage of variation attributable to heterogeneity.

**Figure S8.** City-specific and overall meta-analyses estimates for associations between same year, 1-5 year, and 6-10 year average of total PM<sub>2.5</sub> exposure and incident stroke. Hazard ratios and 95% confidence intervals per 1.94 µg/m<sup>3</sup> PM<sub>2.5</sub>. Fixed effects meta-analyses used inverse variance weighted estimates. Random effects meta-analyses used a DerSimonian and Laird methodology. I-squared statistics and p-value for the chi-squared test of significance of the hazard ratio for the fixed effect models for each time-window were as follows: <sup>a</sup>28.5%, p=0.241, <sup>b</sup>0.0%, p=0.518, <sup>c</sup>0.0%, p=0.476. I-squared statistic is the percentage of variation attributable to heterogeneity.

**Figure S9.** City-specific and overall meta-analyses estimates for associations between same year, 1-5 year, and 6-10 year average of total BC exposure and incident stroke. Hazard ratios and 95% confidence intervals per 0.31 µg/m<sup>3</sup> BC. Fixed effects meta-analyses used inverse variance weighted estimates. Random effects meta-analyses used a DerSimonian and Laird methodology. I-squared statistics and p-value for the chi-squared test of significance of the hazard ratio for the fixed effect models for each time-window were as follows: <sup>a</sup>0.0%, p=0.663, <sup>b</sup>0.0%, p=0.847, <sup>c</sup>0.0%, p=0.716. I-squared statistic is the percentage of variation attributable to heterogeneity.

**Figure S10.** City-specific and overall meta-analyses estimates for associations between same year average BC levels from traffic sources and incident stroke. Hazard ratios and 95% confidence intervals per 0.26 µg/m<sup>3</sup> BC from traffic sources. I-V, inverse variance weighted fixed-effects meta-analyses. I-squared statistic is the percentage of variation attributable to heterogeneity. P-value for the chi-squared test of significance of hazard ratio of fixed-effect model. D+L, DerSimonian and Laird random-effects estimates.
